# Supplementary material
Source: PubMed Central journal article supplement (PMC6309804)
Supplement: NIHMS1505986-supplement-Supplementary_File.pdf [file NIHMS1505986-supplement-Supplementary_File.pdf]

**Supplemental Material: Table I. Baseline Characteristics by Intervention Group (Intent-To-Treat Population)**

| Characteristic                                               |                 | Total<br>(N=148)     | Intervention Group   |                     |
|--------------------------------------------------------------|-----------------|----------------------|----------------------|---------------------|
|                                                              |                 |                      | LDMTX<br>(N=74)      | Placebo<br>(N=74)   |
| Age (years)                                                  | Median (Q1, Q3) | 54 (50, 59)          | 55 (51, 60)          | 53 (49, 56)         |
| Sex                                                          | M               | 137 (93%)            | 68 (92%)             | 69 (93%)            |
|                                                              | F               | 11 (7%)              | 6 (8%)               | 5 (7%)              |
| CD4+ T-cells (/mm <sup>3</sup> )                             | Median (Q1, Q3) | 726 (550, 925)       | 684 (538, 883)       | 731 (560, 948)      |
| CD8+ T-cells (/mm <sup>3</sup> )                             | Median (Q1, Q3) | 830 (573, 1075)      | 831 (538, 993)       | 829 (596, 1136)     |
| 10-year ASCVD risk (%)                                       | Median (Q1, Q3) | 8.5 (5.1, 12.9)      | 9.4 (6.0, 14.1)      | 7.9 (5.1, 11.7)     |
| Smoking history                                              | Never Smoked    | 57 (39%)             | 32 (44%)             | 25 (34%)            |
|                                                              | >1-5 years      | 7 (5%)               | 3 (4%)               | 4 (5%)              |
|                                                              | >5-10 years     | 7 (5%)               | 1 (1%)               | 6 (8%)              |
|                                                              | >10 years       | 75 (51%)             | 37 (51%)             | 38 (51%)            |
| Weight (kg)                                                  | Median (Q1, Q3) | 85.7 (75.5, 96.9)    | 88.2 (77.2, 98.7)    | 84.3 (74.4, 93.3)   |
| Total cholesterol (mg/dL)                                    | Median (Q1, Q3) | 175.0 (157.0, 208.5) | 181.5 (157.0, 216.0) | 172 (157, 192)      |
| High-density lipoprotein cholesterol (mg/dL)                 | Median (Q1, Q3) | 44 (36, 56)          | 47 (38, 59)          | 42.5 (35.0, 54.0)   |
| Glucose (mg/dL)                                              | Median (Q1, Q3) | 93 (86, 102)         | 94 (87, 104)         | 92 (84, 101)        |
| C-reactive protein (mg/L)                                    | Median (Q1, Q3) | 2.2 (1.1, 4.3)       | 2.4 (1.3, 5.0)       | 2.0 (1.0, 4.1)      |
| D-dimer (ng/ml)                                              | Median (Q1, Q3) | 143.5 (98.8, 193.5)  | 151.5 (111.2, 220.1) | 140.5 (90.4, 171.2) |
| Lipid-lowering medication use                                | Yes             | 93 (63%)             | 46 (62%)             | 47 (64%)            |
|                                                              | No              | 55 (37%)             | 28 (38%)             | 27 (36%)            |
| Antihypertensive medication use                              | Yes             | 103 (70%)            | 50 (68%)             | 53 (72%)            |
|                                                              | No              | 45 (30%)             | 24 (32%)             | 21 (28%)            |
| Hypoglycemic medication use                                  | Yes             | 32 (22%)             | 14 (19%)             | 18 (24%)            |
|                                                              | No              | 116 (78%)            | 60 (81%)             | 56 (76%)            |
| Brachial artery flow-mediated dilation (%)                   | Median (Q1, Q3) | 3.4 (2.1, 4.8)       | 3.5 (2.2, 4.8)       | 3.1 (2.0, 4.6)      |
| Brachial artery grayscale median (u)                         | Median (Q1, Q3) | 75.9 (63.7, 89.0)    | 74.8 (64.3, 86.8)    | 77.7 (62.1, 93.5)   |
| Brachial artery gray level difference statistic-contrast (u) | Median (Q1, Q3) | 120.4 (80.2, 184.1)  | 135.0 (74.5, 195.2)  | 117.1 (82.6, 166.5) |
| Brachial artery entropy (u)                                  | Median (Q1, Q3) | 4.2 (4.0, 4.4)       | 4.2 (4.0, 4.4)       | 4.2 (4.0, 4.3)      |

**Supplemental Material: Table II. Brachial Artery Grayscale Measures by Intervention Group at Baseline and Changes at Week 24 (Intent-To-Treat Population)**

|                                                 |                | <b>Total<br/>(N = 176)</b> | <b>LDMTX<br/>(N = 86)</b> | <b>Placebo<br/>(N = 90)</b> | <b>Group<br/>Difference</b> |
|-------------------------------------------------|----------------|----------------------------|---------------------------|-----------------------------|-----------------------------|
| <b>Grayscale median</b>                         |                |                            |                           |                             |                             |
| Week 0                                          | N              | 162                        | 83                        | 79                          |                             |
|                                                 | Median         | 75.1                       | 74.1                      | 77.4                        |                             |
|                                                 | (Q1, Q3)       | (62.2, 88.5)               | (63.1, 86.8)              | (62.1, 93.5)                |                             |
| $\Delta$ to Week 24                             | N              | 148                        | 74                        | 74                          |                             |
|                                                 | Median         | 0.16                       | -0.81                     | 1.30                        |                             |
|                                                 | (Q1, Q3)       | (-11.7, 10.7)              | (-11.5, 8.74)             | (-12.5, 11.0)               |                             |
|                                                 | P-value        | 0.55                       | 0.62                      | 0.74                        | 0.89                        |
| <b>Gray level difference statistic-contrast</b> |                |                            |                           |                             |                             |
| Week 0                                          | N              | 162                        | 83                        | 79                          |                             |
|                                                 | Median         | 120.4                      | 126.4                     | 118.2                       |                             |
|                                                 | (Q1, Q3)       | (78.3, 185.3)              | (69.9, 195.2)             | (82.6, 173.4)               |                             |
| % $\Delta$ to Week 24                           | N              | 148                        | 74                        | 74                          |                             |
|                                                 | Median         | 4.8%                       | 13.0%                     | -1.7%                       |                             |
|                                                 | (Q1, Q3)       | (-21.8, 51.1)%             | (21.3, 58.6)%             | (-28.2, 39.3)%              |                             |
|                                                 | P-value        | 0.09                       | <b>0.010</b>              | 0.82                        | 0.06                        |
| <b>Entropy</b>                                  |                |                            |                           |                             |                             |
| Week 0                                          | N              | 162                        | 83                        | 79                          |                             |
|                                                 | Median         | 4.18                       | 4.18                      | 4.20                        |                             |
|                                                 | (Q1, Q3)       | (4.00, 4.39)               | (3.96, 4.39)              | (4.02, 4.39)                |                             |
| $\Delta$ to Week 24                             | N              | 148                        | 74                        | 74                          |                             |
|                                                 | Median         | 0.02                       | 0.07                      | 0.01                        |                             |
|                                                 | (Q1, Q3)       | (-0.11, 0.19)              | (-0.09, 0.23)             | (-0.11, 0.14)               |                             |
|                                                 | <b>P-value</b> | <b>0.029</b>               | <b>0.017</b>              | 0.59                        | 0.13                        |
